# Supplementary material for: Feeling sleepy? stop driving—awareness of fall asleep crashes
Source: PubMed Central journal article supplement — Sleep. 2023 May 9;46(11):zsad136. doi: 10.1093/sleep/zsad136 (PMC10636256; doi:10.1093/sleep/zsad136), 2023-05-09
Supplement: zsad136_suppl_supplementary_data.pdf [file zsad136_suppl_supplementary_data.pdf]

## *Supplementary Data*

### **Feeling sleepy? Stop Driving - Awareness of Fall Asleep Crashes**

Clare Anderson<sup>1,2,3</sup>, Anna W.T. Cai<sup>1</sup>, Michael L. Lee<sup>2,3</sup>, William J. Horrey<sup>4,5</sup>, Yulan Liang<sup>4</sup>,  
Conor S. O'Brien<sup>2,6</sup>, Charles A Czeisler<sup>2,3</sup>, and Mark E. Howard<sup>1,2,3,7</sup>.

<sup>1</sup> Turner Institute of Brain and Mental Health, School of Psychological Sciences, Monash University, Clayton, VIC 3800 Australia

<sup>2</sup> Division of Sleep and Circadian Disorders, Departments of Medicine and Neurology, Brigham and Women's Hospital, Boston, MA 02115 USA\*

<sup>3</sup> Division of Sleep Medicine, Harvard Medical School, Boston, MA 02115 USA\*

<sup>4</sup> Center for Behavioral Sciences, Liberty Mutual Research Institute for Safety, Hopkinton, MA 01748 USA

<sup>5</sup> AAA Foundation for Traffic Safety, Washington, D.C. 20005 USA

<sup>6</sup> Center for Innovation in Digital Healthcare, Mass General Hospital, Boston MA USA

<sup>7</sup> Institute for Breathing and Sleep, Austin Health, Heidelberg, VIC 3084 Australia

\*Work was undertaken here

#### **Corresponding Author:**

Clare Anderson, PhD.

Turner Institute of Brain and Mental Health,

School of Psychological Sciences,

Monash University,

Clayton,

Victoria, 3800

Australia

Tel: +61 (3) 9905 1714

Fax: +61 (3) 9905 3948

Email: [clare.anderson@monash.edu](mailto:clare.anderson@monash.edu)

*Supplementary Data 1*

# Supplementary Data

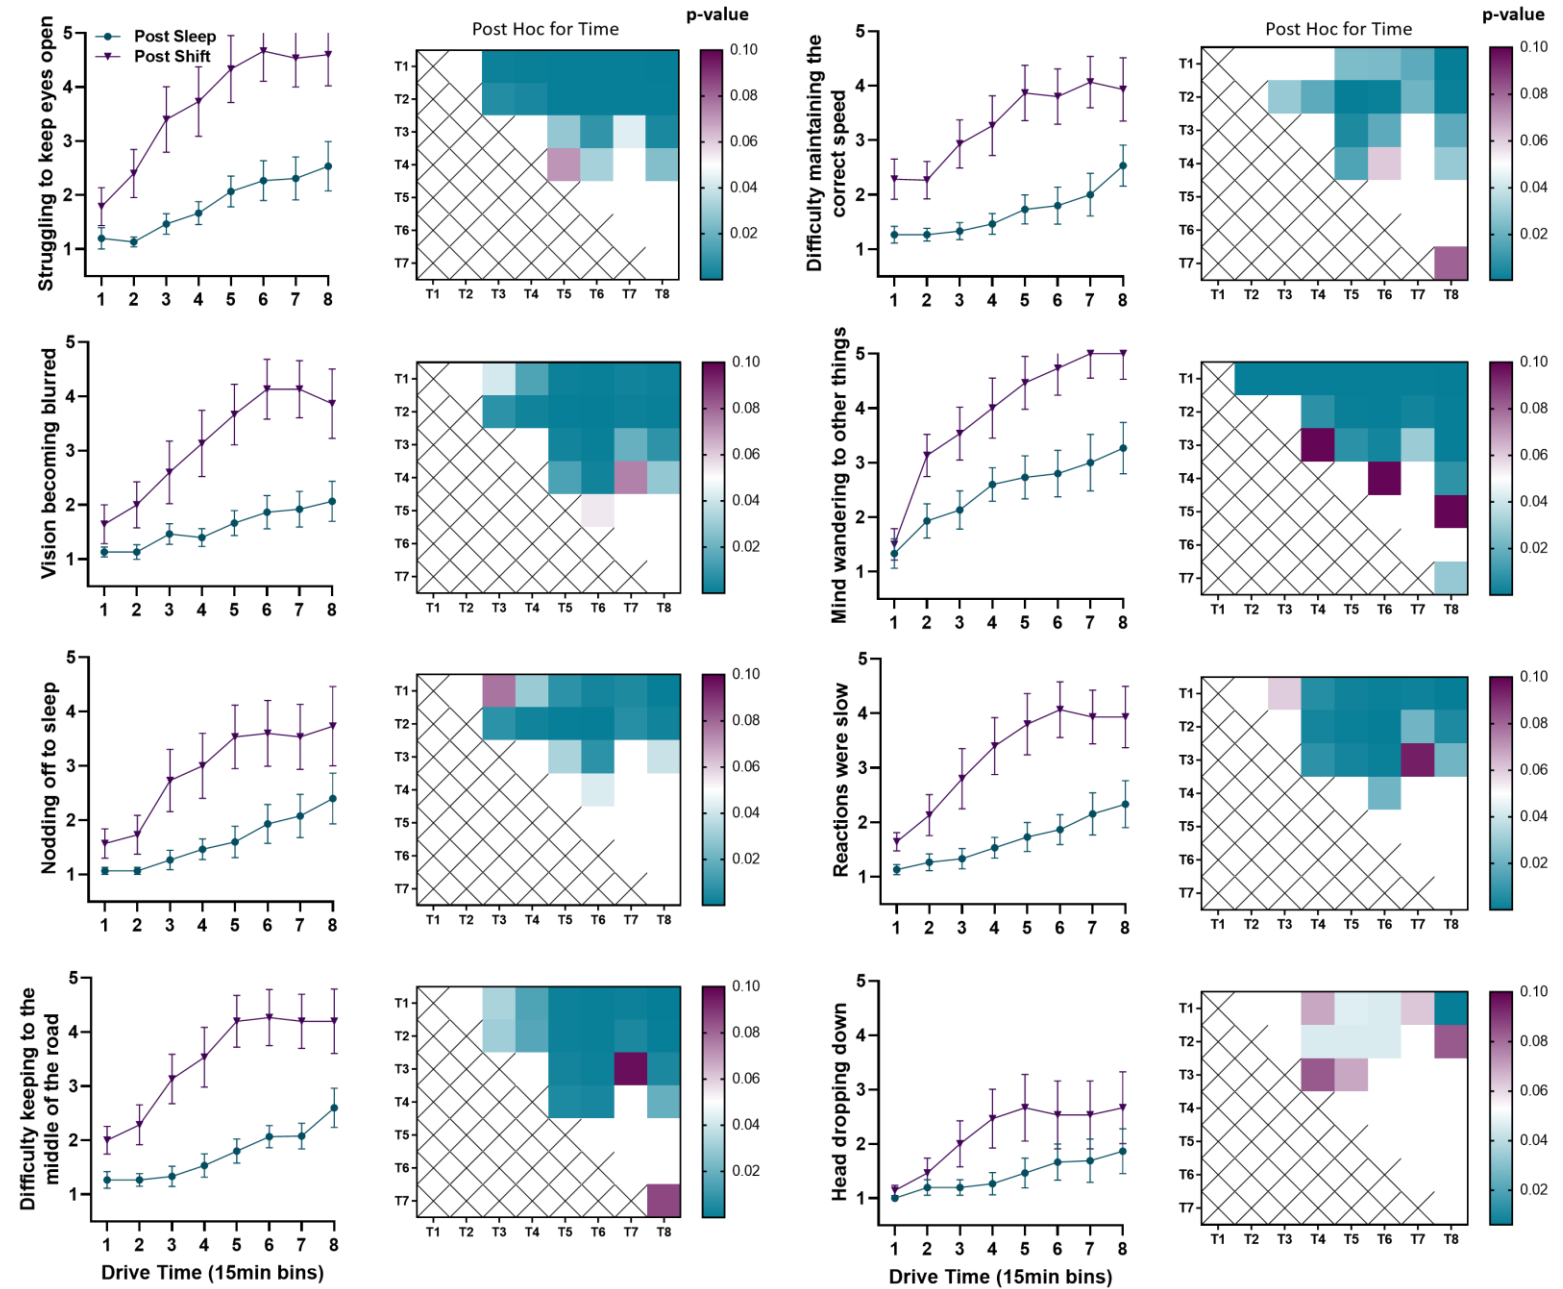

**Figure S1: Effect of night shift on self-reported behavioural signs of sleepiness.** Post night shift drives led to increase in all behavioural signs [all  $p < 0.001$ , except blurred vision ( $p = 0.007$ ) head dropping ( $p = 0.03$ )]. Effect of drive time observed for all variables [all  $p < 0.001$ , except head dropping ( $p = 0.004$ )]. Interaction observed between nightshift and drive time for difficulty keeping to middle of road ( $p = 0.041$ ) and mind wandering ( $p = 0.008$ ), such that the night shift led to increased severity of these behaviours over the course of the drive. All others not significant ( $p > 0.079$ ).

*Supplementary Data 2*

## Subjective versus Braking Events

*Sensitivity and Specificity for each Threshold*

| KSS vs Braking Events |             |                        |             |                         |              |
|-----------------------|-------------|------------------------|-------------|-------------------------|--------------|
| Cutoff >              | Sensitivity | 95% CI                 | Specificity | 95% CI                  | youden's j   |
| 1.5                   | 1.00        | 0.5407 to 1.000        | 0.14        | 0.09830 to 0.1996       | 0.144        |
| 2.5                   | 1.00        | 0.5407 to 1.000        | 0.37        | 0.3045 to 0.4419        | 0.371        |
| 3.5                   | 1.00        | 0.5407 to 1.000        | 0.55        | 0.4781 to 0.6194        | 0.550        |
| 4.5                   | 1.00        | 0.5407 to 1.000        | 0.63        | 0.5632 to 0.7002        | 0.634        |
| 5.5                   | 1.00        | 0.5407 to 1.000        | 0.70        | 0.6296 to 0.7605        | 0.698        |
| <b>6.5</b>            | <b>1.00</b> | <b>0.5407 to 1.000</b> | <b>0.75</b> | <b>0.6870 to 0.8104</b> | <b>0.753</b> |
| 7.5                   | 0.83        | 0.3588 to 0.9958       | 0.84        | 0.7838 to 0.8890        | 0.675        |
| 8.5                   | 0.33        | 0.04327 to 0.7772      | 0.93        | 0.8864 to 0.9616        | 0.264        |

| LFA vs Braking Events |             |                        |             |                         |              |
|-----------------------|-------------|------------------------|-------------|-------------------------|--------------|
| Cutoff >              | Sensitivity | 95% CI                 | Specificity | 95% CI                  | youden's j   |
| 1.5                   | 1.00        | 0.5407 to 1.000        | 0.49        | 0.4193 to 0.5612        | 0.490        |
| <b>2.5</b>            | <b>1.00</b> | <b>0.5407 to 1.000</b> | <b>0.75</b> | <b>0.6818 to 0.8059</b> | <b>0.748</b> |
| 3.5                   | 0.33        | 0.04327 to 0.7772      | 0.85        | 0.7893 to 0.8933        | 0.180        |
| 4.5                   | 0.33        | 0.04327 to 0.7772      | 0.91        | 0.8570 to 0.9424        | 0.239        |

| SSQ1 vs Braking Events |             |                         |             |                         |              |
|------------------------|-------------|-------------------------|-------------|-------------------------|--------------|
| Cutoff >               | Sensitivity | 95% CI                  | Specificity | 95% CI                  | youden's j   |
| 1.5                    | 1.00        | 0.5407 to 1.000         | 0.46        | 0.3854 to 0.5268        | 0.455        |
| 2.5                    | 1.00        | 0.5407 to 1.000         | 0.69        | 0.6245 to 0.7559        | 0.693        |
| 3.5                    | 0.83        | 0.3588 to 0.9958        | 0.81        | 0.7511 to 0.8633        | 0.645        |
| 4.5                    | 0.83        | 0.3588 to 0.9958        | 0.85        | 0.7948 to 0.8975        | 0.685        |
| <b>5.5</b>             | <b>0.83</b> | <b>0.3588 to 0.9958</b> | <b>0.91</b> | <b>0.8570 to 0.9424</b> | <b>0.739</b> |
| 6.5                    | 0.33        | 0.04327 to 0.7772       | 0.94        | 0.8985 to 0.9689        | 0.274        |

| SSQ2 vs Braking Events |             |                        |             |                         |              |
|------------------------|-------------|------------------------|-------------|-------------------------|--------------|
| Cutoff >               | Sensitivity | 95% CI                 | Specificity | 95% CI                  | youden's j   |
| 1.5                    | 1.00        | 0.5407 to 1.000        | 0.58        | 0.5129 to 0.6529        | 0.584        |
| <b>2.5</b>             | <b>1.00</b> | <b>0.5407 to 1.000</b> | <b>0.77</b> | <b>0.7029 to 0.8238</b> | <b>0.767</b> |
| 3.5                    | 0.83        | 0.3588 to 0.9958       | 0.85        | 0.7893 to 0.8933        | 0.680        |
| 4.5                    | 0.83        | 0.3588 to 0.9958       | 0.89        | 0.8341 to 0.9264        | 0.719        |
| 5.5                    | 0.50        | 0.1181 to 0.8819       | 0.94        | 0.8985 to 0.9689        | 0.441        |
| 6.5                    | 0.00        | 0.0 to 0.4593          | 0.97        | 0.9365 to 0.9890        | -0.030       |

| SSQ3 vs Braking Events |             |                        |             |                         |              |
|------------------------|-------------|------------------------|-------------|-------------------------|--------------|
| Cutoff >               | Sensitivity | 95% CI                 | Specificity | 95% CI                  | youden's j   |
| <b>1.5</b>             | <b>1.00</b> | <b>0.5407 to 1.000</b> | <b>0.64</b> | <b>0.5682 to 0.7049</b> | <b>0.639</b> |
| 2.5                    | 0.83        | 0.3588 to 0.9958       | 0.79        | 0.7295 to 0.8458        | 0.625        |
| 3.5                    | 0.67        | 0.2228 to 0.9567       | 0.87        | 0.8171 to 0.9142        | 0.538        |
| 4.5                    | 0.50        | 0.1181 to 0.8819       | 0.90        | 0.8512 to 0.9385        | 0.401        |
| 5.5                    | 0.33        | 0.04327 to 0.7772      | 0.93        | 0.8805 to 0.9578        | 0.259        |
| 6.5                    | 0.00        | 0.0 to 0.4593          | 0.98        | 0.9432 to 0.9919        | -0.025       |

| SSQ4 vs Braking Events |             |                         |             |                         |              |
|------------------------|-------------|-------------------------|-------------|-------------------------|--------------|
| Cutoff >               | Sensitivity | 95% CI                  | Specificity | 95% CI                  | youden's j   |
| 1.5                    | 1.00        | 0.5407 to 1.000         | 0.39        | 0.3186 to 0.4570        | 0.386        |
| 2.5                    | 0.83        | 0.3588 to 0.9958        | 0.66        | 0.5937 to 0.7282        | 0.497        |
| 3.5                    | 0.83        | 0.3588 to 0.9958        | 0.83        | 0.7728 to 0.8805        | 0.665        |
| <b>4.5</b>             | <b>0.83</b> | <b>0.3588 to 0.9958</b> | <b>0.90</b> | <b>0.8512 to 0.9385</b> | <b>0.734</b> |
| 5.5                    | 0.50        | 0.1181 to 0.8819        | 0.94        | 0.8925 to 0.9653        | 0.436        |
| 6.5                    | 0.17        | 0.004211 to 0.6412      | 0.98        | 0.9432 to 0.9919        | 0.142        |

| SSQ5 vs Braking Events |             |                         |             |                         |              |
|------------------------|-------------|-------------------------|-------------|-------------------------|--------------|
| Cutoff >               | Sensitivity | 95% CI                  | Specificity | 95% CI                  | youden's j   |
| 1.5                    | 0.83        | 0.3588 to 0.9958        | 0.45        | 0.3758 to 0.5169        | 0.279        |
| 2.5                    | 0.83        | 0.3588 to 0.9958        | 0.68        | 0.6090 to 0.7421        | 0.512        |
| <b>3.5</b>             | <b>0.83</b> | <b>0.3588 to 0.9958</b> | <b>0.84</b> | <b>0.7838 to 0.8890</b> | <b>0.675</b> |
| 4.5                    | 0.67        | 0.2228 to 0.9567        | 0.89        | 0.8398 to 0.9305        | 0.558        |
| 5.5                    | 0.33        | 0.04327 to 0.7772       | 0.96        | 0.9235 to 0.9827        | 0.294        |
| 6.5                    | 0.00        | 0.0 to 0.4593           | 0.98        | 0.9501 to 0.9946        | -0.020       |

| SSQ6 vs Braking Events |             |                         |             |                         |              |
|------------------------|-------------|-------------------------|-------------|-------------------------|--------------|
| Cutoff >               | Sensitivity | 95% CI                  | Specificity | 95% CI                  | youden's j   |
| 1.5                    | 1.00        | 0.5407 to 1.000         | 0.30        | 0.2349 to 0.3652        | 0.297        |
| 2.5                    | 0.83        | 0.3588 to 0.9958        | 0.59        | 0.5179 to 0.6577        | 0.422        |
| 3.5                    | 0.83        | 0.3588 to 0.9958        | 0.70        | 0.6348 to 0.7651        | 0.536        |
| 4.5                    | 0.83        | 0.3588 to 0.9958        | 0.80        | 0.7349 to 0.8502        | 0.630        |
| <b>5.5</b>             | <b>0.83</b> | <b>0.3588 to 0.9958</b> | <b>0.89</b> | <b>0.8398 to 0.9305</b> | <b>0.724</b> |
| 6.5                    | 0.33        | 0.04327 to 0.7772       | 0.96        | 0.9235 to 0.9827        | 0.294        |

| SSQ7 vs Braking Events |             |                         |             |                         |              |
|------------------------|-------------|-------------------------|-------------|-------------------------|--------------|
| Cutoff >               | Sensitivity | 95% CI                  | Specificity | 95% CI                  | youden's j   |
| 1.5                    | 1.00        | 0.5407 to 1.000         | 0.48        | 0.4047 to 0.5465        | 0.475        |
| 2.5                    | 0.83        | 0.3588 to 0.9958        | 0.74        | 0.6765 to 0.8014        | 0.576        |
| <b>3.5</b>             | <b>0.83</b> | <b>0.3588 to 0.9958</b> | <b>0.86</b> | <b>0.8004 to 0.9017</b> | <b>0.690</b> |
| 4.5                    | 0.50        | 0.1181 to 0.8819        | 0.89        | 0.8398 to 0.9305        | 0.391        |
| 5.5                    | 0.17        | 0.004211 to 0.6412      | 0.94        | 0.8925 to 0.9653        | 0.102        |
| 6.5                    | 0.00        | 0.0 to 0.4593           | 0.98        | 0.9432 to 0.9919        | -0.025       |

| SSQ8 vs Braking Events |             |                         |             |                         |              |
|------------------------|-------------|-------------------------|-------------|-------------------------|--------------|
| Cutoff >               | Sensitivity | 95% CI                  | Specificity | 95% CI                  | youden's j   |
| 1.5                    | 0.50        | 0.1181 to 0.8819        | 0.75        | 0.6870 to 0.8104        | 0.253        |
| <b>2.5</b>             | <b>0.50</b> | <b>0.1181 to 0.8819</b> | <b>0.88</b> | <b>0.8227 to 0.9183</b> | <b>0.376</b> |
| 3.5                    | 0.17        | 0.004211 to 0.6412      | 0.91        | 0.8628 to 0.9463        | 0.078        |
| 4.5                    | 0.17        | 0.004211 to 0.6412      | 0.93        | 0.8805 to 0.9578        | 0.092        |
| 5.5                    | 0.00        | 0.0 to 0.4593           | 0.96        | 0.9171 to 0.9794        | -0.045       |
| 6.5                    | 0.00        | 0.0 to 0.4593           | 0.98        | 0.9501 to 0.9946        | -0.020       |

| SSQG vs Braking Events |             |                         |             |                         |              |
|------------------------|-------------|-------------------------|-------------|-------------------------|--------------|
| Cutoff >               | Sensitivity | 95% CI                  | Specificity | 95% CI                  | youden's j   |
| 8.5                    | 1.00        | 0.5407 to 1.000         | 0.15        | 0.1067 to 0.2107        | 0.154        |
| 9.5                    | 1.00        | 0.5407 to 1.000         | 0.25        | 0.1896 to 0.3130        | 0.248        |
| 10.5                   | 1.00        | 0.5407 to 1.000         | 0.35        | 0.2811 to 0.4165        | 0.347        |
| 11.5                   | 1.00        | 0.5407 to 1.000         | 0.43        | 0.3614 to 0.5020        | 0.431        |
| 12.5                   | 1.00        | 0.5407 to 1.000         | 0.49        | 0.4144 to 0.5563        | 0.485        |
| 13.5                   | 1.00        | 0.5407 to 1.000         | 0.53        | 0.4633 to 0.6050        | 0.535        |
| 14.5                   | 1.00        | 0.5407 to 1.000         | 0.58        | 0.5079 to 0.6481        | 0.579        |
| 15.5                   | 1.00        | 0.5407 to 1.000         | 0.61        | 0.5430 to 0.6814        | 0.614        |
| 16.5                   | 0.83        | 0.3588 to 0.9958        | 0.63        | 0.5581 to 0.6955        | 0.462        |
| 17.5                   | 0.83        | 0.3588 to 0.9958        | 0.66        | 0.5937 to 0.7282        | 0.497        |
| 18.5                   | 0.83        | 0.3588 to 0.9958        | 0.71        | 0.6400 to 0.7696        | 0.541        |
| 19.5                   | 0.83        | 0.3588 to 0.9958        | 0.73        | 0.6660 to 0.7923        | 0.566        |
| 20.5                   | 0.83        | 0.3588 to 0.9958        | 0.74        | 0.6765 to 0.8014        | 0.576        |
| 21.5                   | 0.83        | 0.3588 to 0.9958        | 0.76        | 0.6923 to 0.8148        | 0.591        |
| 22.5                   | 0.83        | 0.3588 to 0.9958        | 0.80        | 0.7403 to 0.8546        | 0.635        |
| 23.5                   | 0.83        | 0.3588 to 0.9958        | 0.81        | 0.7511 to 0.8633        | 0.645        |
| 24.5                   | 0.83        | 0.3588 to 0.9958        | 0.84        | 0.7783 to 0.8848        | 0.670        |
| 26                     | 0.83        | 0.3588 to 0.9958        | 0.85        | 0.7948 to 0.8975        | 0.685        |
| 27.5                   | 0.83        | 0.3588 to 0.9958        | 0.87        | 0.8115 to 0.9100        | 0.700        |
| 28.5                   | 0.83        | 0.3588 to 0.9958        | 0.87        | 0.8171 to 0.9142        | 0.705        |
| 30                     | 0.83        | 0.3588 to 0.9958        | 0.89        | 0.8341 to 0.9264        | 0.719        |
| <b>33.5</b>            | <b>0.83</b> | <b>0.3588 to 0.9958</b> | <b>0.90</b> | <b>0.8455 to 0.9345</b> | <b>0.729</b> |
| 36.5                   | 0.67        | 0.2228 to 0.9567        | 0.90        | 0.8512 to 0.9385        | 0.568        |
| 37.5                   | 0.67        | 0.2228 to 0.9567        | 0.91        | 0.8570 to 0.9424        | 0.573        |
| 38.5                   | 0.67        | 0.2228 to 0.9567        | 0.91        | 0.8628 to 0.9463        | 0.578        |
| 40                     | 0.50        | 0.1181 to 0.8819        | 0.91        | 0.8628 to 0.9463        | 0.411        |
| 41.5                   | 0.33        | 0.04327 to 0.7772       | 0.92        | 0.8746 to 0.9540        | 0.254        |
| 42.5                   | 0.33        | 0.04327 to 0.7772       | 0.93        | 0.8864 to 0.9616        | 0.264        |
| 43.5                   | 0.33        | 0.04327 to 0.7772       | 0.95        | 0.9047 to 0.9725        | 0.279        |
| 44.5                   | 0.17        | 0.004211 to 0.6412      | 0.95        | 0.9108 to 0.9760        | 0.117        |
| 46.5                   | 0.17        | 0.004211 to 0.6412      | 0.97        | 0.9299 to 0.9860        | 0.132        |
| 48.5                   | 0.00        | 0.0 to 0.4593           | 0.97        | 0.9365 to 0.9890        | -0.030       |
| 51                     | 0.00        | 0.0 to 0.4593           | 0.98        | 0.9432 to 0.9919        | -0.025       |
| 54.5                   | 0.00        | 0.0 to 0.4593           | 0.98        | 0.9501 to 0.9946        | -0.020       |

## Subjective versus Lane Deviations

*Sensitivity and Specificity for each Threshold*

| KSS vs Lane Deviations |              |                         |              |                         |              |
|------------------------|--------------|-------------------------|--------------|-------------------------|--------------|
| Cutoff >               | Sensitivity  | 95% CI                  | Specificity  | 95% CI                  | youden's j   |
| 1.5                    | 0.927        | 0.8367 to 0.9757        | 0.171        | 0.1130 to 0.2442        | 0.098        |
| 2.5                    | 0.779        | 0.6624 to 0.8710        | 0.429        | 0.3453 to 0.5149        | 0.208        |
| 3.5                    | 0.603        | 0.4770 to 0.7197        | 0.600        | 0.5139 to 0.6818        | 0.203        |
| <b>4.5</b>             | <b>0.544</b> | <b>0.4188 to 0.6655</b> | <b>0.693</b> | <b>0.6094 to 0.7680</b> | <b>0.237</b> |
| 5.5                    | 0.471        | 0.3483 to 0.5955        | 0.750        | 0.6698 to 0.8193        | 0.221        |
| 6.5                    | 0.397        | 0.2803 to 0.5230        | 0.793        | 0.7162 to 0.8567        | 0.190        |
| 7.5                    | 0.235        | 0.1409 to 0.3538        | 0.850        | 0.7799 to 0.9047        | 0.085        |
| 8.5                    | 0.118        | 0.05218 to 0.2187       | 0.943        | 0.8905 to 0.9750        | 0.061        |

| LFA vs Lane Deviations |              |                         |              |                         |              |
|------------------------|--------------|-------------------------|--------------|-------------------------|--------------|
| Cutoff >               | Sensitivity  | 95% CI                  | Specificity  | 95% CI                  | youden's j   |
| 1.5                    | 0.574        | 0.4477 to 0.6928        | 0.500        | 0.4144 to 0.5856        | 0.074        |
| <b>2.5</b>             | <b>0.382</b> | <b>0.2671 to 0.5082</b> | <b>0.779</b> | <b>0.7007 to 0.8443</b> | <b>0.161</b> |
| 3.5                    | 0.221        | 0.1290 to 0.3376        | 0.871        | 0.8044 to 0.9220        | 0.092        |
| 4.5                    | 0.132        | 0.06235 to 0.2364       | 0.914        | 0.8551 to 0.9549        | 0.047        |

| SSQ1 vs Lane Deviations |              |                         |              |                         |              |
|-------------------------|--------------|-------------------------|--------------|-------------------------|--------------|
| Cutoff >                | Sensitivity  | 95% CI                  | Specificity  | 95% CI                  | youden's j   |
| <b>1.5</b>              | <b>0.662</b> | <b>0.5368 to 0.7721</b> | <b>0.493</b> | <b>0.4074 to 0.5786</b> | <b>0.155</b> |
| 2.5                     | 0.397        | 0.2803 to 0.5230        | 0.707        | 0.6243 to 0.7809        | 0.104        |
| 3.5                     | 0.309        | 0.2024 to 0.4326        | 0.843        | 0.7718 to 0.8988        | 0.152        |
| 4.5                     | 0.221        | 0.1290 to 0.3376        | 0.857        | 0.7880 to 0.9105        | 0.078        |
| 5.5                     | 0.118        | 0.05218 to 0.2187       | 0.886        | 0.8210 to 0.9332        | 0.003        |
| 6.5                     | 0.088        | 0.03307 to 0.1822       | 0.943        | 0.8905 to 0.9750        | 0.031        |

| SSQ2 vs Lane Deviations |              |                         |              |                         |              |
|-------------------------|--------------|-------------------------|--------------|-------------------------|--------------|
| Cutoff >                | Sensitivity  | 95% CI                  | Specificity  | 95% CI                  | youden's j   |
| <b>1.5</b>              | <b>0.544</b> | <b>0.4188 to 0.6655</b> | <b>0.621</b> | <b>0.5356 to 0.7020</b> | <b>0.165</b> |
| 2.5                     | 0.353        | 0.2408 to 0.4783        | 0.793        | 0.7162 to 0.8567        | 0.146        |
| 3.5                     | 0.250        | 0.1529 to 0.3698        | 0.864        | 0.7962 to 0.9163        | 0.114        |
| 4.5                     | 0.206        | 0.1174 to 0.3212        | 0.900        | 0.8379 to 0.9442        | 0.106        |
| 5.5                     | 0.118        | 0.05218 to 0.2187       | 0.950        | 0.8997 to 0.9797        | 0.068        |
| 6.5                     | 0.059        | 0.01626 to 0.1438       | 0.986        | 0.9493 to 0.9983        | 0.045        |

| SSQ3 vs Lane Deviations |              |                         |              |                         |              |
|-------------------------|--------------|-------------------------|--------------|-------------------------|--------------|
| Cutoff >                | Sensitivity  | 95% CI                  | Specificity  | 95% CI                  | youden's j   |
| <b>1.5</b>              | <b>0.500</b> | <b>0.3762 to 0.6238</b> | <b>0.679</b> | <b>0.5945 to 0.7549</b> | <b>0.179</b> |
| 2.5                     | 0.279        | 0.1773 to 0.4015        | 0.800        | 0.7241 to 0.8628        | 0.079        |
| 3.5                     | 0.191        | 0.1059 to 0.3047        | 0.879        | 0.8127 to 0.9276        | 0.070        |
| 4.5                     | 0.162        | 0.08362 to 0.2710       | 0.914        | 0.8551 to 0.9549        | 0.076        |
| 5.5                     | 0.132        | 0.06235 to 0.2364       | 0.943        | 0.8905 to 0.9750        | 0.075        |
| 6.5                     | 0.044        | 0.009192 to 0.1236      | 0.986        | 0.9493 to 0.9983        | 0.030        |



| SSQ4 vs Lane Deviations |              |                         |              |                         |              |       |
|-------------------------|--------------|-------------------------|--------------|-------------------------|--------------|-------|
| Cutoff >                | Sensitivity  | 95% CI                  | Specificity  | 95% CI                  | youden's j   |       |
| 1.5                     | <b>0.750</b> | <b>0.6302 to 0.8471</b> | <b>0.436</b> | <b>0.3522 to 0.5220</b> | <b>0.186</b> |       |
| 2.5                     | 0.427        | 0.3072 to 0.5523        | 0.686        | 0.6019 to 0.7615        | 0.112        |       |
| 3.5                     | 0.265        | 0.1650 to 0.3857        | 0.850        | 0.7799 to 0.9047        | 0.115        |       |
| 4.5                     | 0.177        | 0.09465 to 0.2880       | 0.907        | 0.8464 to 0.9496        | 0.084        |       |
| 5.5                     | 0.074        | 0.02431 to 0.1633       | 0.921        | 0.8638 to 0.9601        | -            | 0.005 |
| 6.5                     | 0.029        | 0.003582 to 0.1022      | 0.971        | 0.9285 to 0.9922        | 0.001        |       |

| SSQ5 vs Lane Deviations |              |                         |              |                         |              |       |
|-------------------------|--------------|-------------------------|--------------|-------------------------|--------------|-------|
| Cutoff >                | Sensitivity  | 95% CI                  | Specificity  | 95% CI                  | youden's j   |       |
| 1.5                     | <b>0.632</b> | <b>0.5067 to 0.7461</b> | <b>0.471</b> | <b>0.3866 to 0.5575</b> | <b>0.104</b> |       |
| 2.5                     | 0.397        | 0.2803 to 0.5230        | 0.693        | 0.6094 to 0.7680        | 0.090        |       |
| 3.5                     | 0.221        | 0.1290 to 0.3376        | 0.843        | 0.7718 to 0.8988        | 0.063        |       |
| 4.5                     | 0.177        | 0.09465 to 0.2880       | 0.900        | 0.8379 to 0.9442        | 0.077        |       |
| 5.5                     | 0.044        | 0.009192 to 0.1236      | 0.950        | 0.8997 to 0.9797        | -            | 0.006 |
| 6.5                     | 0.029        | 0.003582 to 0.1022      | 0.986        | 0.9493 to 0.9983        | 0.015        |       |

| SSQ6 vs Lane Deviations |              |                         |              |                         |              |       |
|-------------------------|--------------|-------------------------|--------------|-------------------------|--------------|-------|
| Cutoff >                | Sensitivity  | 95% CI                  | Specificity  | 95% CI                  | youden's j   |       |
| 1.5                     | 0.691        | 0.5674 to 0.7976        | 0.279        | 0.2062 to 0.3606        | -            | 0.030 |
| 2.5                     | <b>0.485</b> | <b>0.3622 to 0.6097</b> | <b>0.607</b> | <b>0.5211 to 0.6885</b> | <b>0.092</b> |       |
| 3.5                     | 0.368        | 0.2539 to 0.4933        | 0.714        | 0.6319 to 0.7874        | 0.082        |       |
| 4.5                     | 0.250        | 0.1529 to 0.3698        | 0.793        | 0.7162 to 0.8567        | 0.043        |       |
| 5.5                     | 0.147        | 0.07284 to 0.2539       | 0.879        | 0.8127 to 0.9276        | 0.026        |       |
| 6.5                     | 0.059        | 0.01626 to 0.1438       | 0.957        | 0.9091 to 0.9841        | 0.016        |       |

| SSQ7 vs Lane Deviations |              |                         |              |                         |              |  |
|-------------------------|--------------|-------------------------|--------------|-------------------------|--------------|--|
| Cutoff >                | Sensitivity  | 95% CI                  | Specificity  | 95% CI                  | youden's j   |  |
| 1.5                     | <b>0.603</b> | <b>0.4770 to 0.7197</b> | <b>0.493</b> | <b>0.4074 to 0.5786</b> | <b>0.096</b> |  |
| 2.5                     | 0.324        | 0.2151 to 0.4479        | 0.750        | 0.6698 to 0.8193        | 0.074        |  |
| 3.5                     | 0.206        | 0.1174 to 0.3212        | 0.857        | 0.7880 to 0.9105        | 0.063        |  |
| 4.5                     | 0.177        | 0.09465 to 0.2880       | 0.907        | 0.8464 to 0.9496        | 0.084        |  |
| 5.5                     | 0.118        | 0.05218 to 0.2187       | 0.957        | 0.9091 to 0.9841        | 0.075        |  |
| 6.5                     | 0.044        | 0.009192 to 0.1236      | 0.986        | 0.9493 to 0.9983        | 0.030        |  |

| SSQ8 vs Lane Deviations |              |                         |              |                         |              |  |
|-------------------------|--------------|-------------------------|--------------|-------------------------|--------------|--|
| Cutoff >                | Sensitivity  | 95% CI                  | Specificity  | 95% CI                  | youden's j   |  |
| 1.5                     | <b>0.353</b> | <b>0.2408 to 0.4783</b> | <b>0.793</b> | <b>0.7162 to 0.8567</b> | <b>0.146</b> |  |
| 2.5                     | 0.177        | 0.09465 to 0.2880       | 0.886        | 0.8210 to 0.9332        | 0.062        |  |
| 3.5                     | 0.147        | 0.07284 to 0.2539       | 0.936        | 0.8815 to 0.9702        | 0.083        |  |
| 4.5                     | 0.118        | 0.05218 to 0.2187       | 0.943        | 0.8905 to 0.9750        | 0.061        |  |
| 5.5                     | 0.059        | 0.01626 to 0.1438       | 0.964        | 0.9186 to 0.9883        | 0.023        |  |
| 6.5                     | 0.029        | 0.003582 to 0.1022      | 0.986        | 0.9493 to 0.9983        | 0.015        |  |

| SSQG vs Lane Deviations |              |                         |              |                         |              |  |
|-------------------------|--------------|-------------------------|--------------|-------------------------|--------------|--|
| Cutoff >                | Sensitivity  | 95% CI                  | Specificity  | 95% CI                  | youden's j   |  |
| 8.5                     | 0.882        | 0.7813 to 0.9478        | 0.164        | 0.1071 to 0.2362        | 0.047        |  |
| 9.5                     | 0.853        | 0.7461 to 0.9272        | 0.286        | 0.2126 to 0.3681        | 0.139        |  |
| 10.5                    | 0.794        | 0.6788 to 0.8826        | 0.400        | 0.3182 to 0.4861        | 0.194        |  |
| <b>11.5</b>             | <b>0.750</b> | <b>0.6302 to 0.8471</b> | <b>0.500</b> | <b>0.4144 to 0.5856</b> | <b>0.250</b> |  |
| 12.5                    | 0.632        | 0.5067 to 0.7461        | 0.521        | 0.4354 to 0.6065        | 0.154        |  |
| 13.5                    | 0.588        | 0.4623 to 0.7063        | 0.571        | 0.4851 to 0.6547        | 0.160        |  |
| 14.5                    | 0.529        | 0.4045 to 0.6517        | 0.607        | 0.5211 to 0.6885        | 0.137        |  |
| 15.5                    | 0.515        | 0.3903 to 0.6378        | 0.650        | 0.5649 to 0.7286        | 0.165        |  |
| 16.5                    | 0.485        | 0.3622 to 0.6097        | 0.664        | 0.5796 to 0.7418        | 0.150        |  |
| 17.5                    | 0.412        | 0.2937 to 0.5377        | 0.679        | 0.5945 to 0.7549        | 0.090        |  |
| 18.5                    | 0.368        | 0.2539 to 0.4933        | 0.721        | 0.6394 to 0.7938        | 0.089        |  |
| 19.5                    | 0.338        | 0.2279 to 0.4632        | 0.743        | 0.6622 to 0.8129        | 0.081        |  |
| 20.5                    | 0.338        | 0.2279 to 0.4632        | 0.757        | 0.6775 to 0.8256        | 0.095        |  |
| 21.5                    | 0.338        | 0.2279 to 0.4632        | 0.779        | 0.7007 to 0.8443        | 0.117        |  |
| 22.5                    | 0.279        | 0.1773 to 0.4015        | 0.814        | 0.7398 to 0.8750        | 0.094        |  |
| 23.5                    | 0.250        | 0.1529 to 0.3698        | 0.814        | 0.7398 to 0.8750        | 0.064        |  |
| 24.5                    | 0.235        | 0.1409 to 0.3538        | 0.843        | 0.7718 to 0.8988        | 0.078        |  |
| 26.0                    | 0.206        | 0.1174 to 0.3212        | 0.850        | 0.7799 to 0.9047        | 0.056        |  |
| 27.5                    | 0.191        | 0.1059 to 0.3047        | 0.864        | 0.7962 to 0.9163        | 0.055        |  |
| 28.5                    | 0.191        | 0.1059 to 0.3047        | 0.871        | 0.8044 to 0.9220        | 0.063        |  |
| 30.0                    | 0.177        | 0.09465 to 0.2880       | 0.886        | 0.8210 to 0.9332        | 0.062        |  |
| 33.5                    | 0.162        | 0.08362 to 0.2710       | 0.893        | 0.8294 to 0.9388        | 0.055        |  |
| 36.5                    | 0.162        | 0.08362 to 0.2710       | 0.907        | 0.8464 to 0.9496        | 0.069        |  |
| 37.5                    | 0.162        | 0.08362 to 0.2710       | 0.914        | 0.8551 to 0.9549        | 0.076        |  |
| 38.5                    | 0.147        | 0.07284 to 0.2539       | 0.914        | 0.8551 to 0.9549        | 0.061        |  |
| 40.0                    | 0.147        | 0.07284 to 0.2539       | 0.921        | 0.8638 to 0.9601        | 0.069        |  |
| 41.5                    | 0.132        | 0.06235 to 0.2364       | 0.936        | 0.8815 to 0.9702        | 0.068        |  |
| 42.5                    | 0.118        | 0.05218 to 0.2187       | 0.943        | 0.8905 to 0.9750        | 0.061        |  |
| 43.5                    | 0.088        | 0.03307 to 0.1822       | 0.950        | 0.8997 to 0.9797        | 0.038        |  |
| 44.5                    | 0.074        | 0.02431 to 0.1633       | 0.957        | 0.9091 to 0.9841        | 0.031        |  |
| 46.5                    | 0.059        | 0.01626 to 0.1438       | 0.971        | 0.9285 to 0.9922        | 0.030        |  |
| 48.5                    | 0.044        | 0.009192 to 0.1236      | 0.979        | 0.9387 to 0.9956        | 0.023        |  |
| 51.0                    | 0.044        | 0.009192 to 0.1236      | 0.986        | 0.9493 to 0.9983        | 0.030        |  |
| 54.5                    | 0.029        | 0.003582 to 0.1022      | 0.986        | 0.9493 to 0.9983        | 0.015        |  |

## Subjective versus JDS Critical Scores (4.5+)

Sensitivity and Specificity for each Threshold

| KSS vs JDS 4.5+ |              |                         |              |                         |              |  |
|-----------------|--------------|-------------------------|--------------|-------------------------|--------------|--|
| Cutoff >        | Sensitivity  | 95% CI                  | Specificity  | 95% CI                  | youden's j   |  |
| 1.500           | 1.000        | 0.8049 to 1.000         | 0.152        | 0.1041 to 0.2107        | 0.152        |  |
| 2.500           | 1.000        | 0.8049 to 1.000         | 0.387        | 0.3180 to 0.4605        | 0.387        |  |
| 3.500           | 0.941        | 0.7131 to 0.9985        | 0.571        | 0.4972 to 0.6419        | 0.512        |  |
| 4.500           | 0.882        | 0.6356 to 0.9854        | 0.649        | 0.5770 to 0.7167        | 0.532        |  |
| 5.500           | 0.824        | 0.5657 to 0.9620        | 0.723        | 0.6533 to 0.7847        | 0.546        |  |
| <b>6.500</b>    | <b>0.824</b> | <b>0.5657 to 0.9620</b> | <b>0.780</b> | <b>0.7146 to 0.8367</b> | <b>0.604</b> |  |
| 7.500           | 0.647        | 0.3833 to 0.8579        | 0.869        | 0.8129 to 0.9135        | 0.516        |  |
| 8.500           | 0.353        | 0.1421 to 0.6167        | 0.948        | 0.9058 to 0.9746        | 0.301        |  |

| LFA vs JDS 4.5+ |              |                         |              |                         |              |  |
|-----------------|--------------|-------------------------|--------------|-------------------------|--------------|--|
| Cutoff >        | Sensitivity  | 95% CI                  | Specificity  | 95% CI                  | youden's j   |  |
| 1.500           | 0.941        | 0.7131 to 0.9985        | 0.508        | 0.4347 to 0.5808        | 0.449        |  |
| <b>2.500</b>    | <b>0.706</b> | <b>0.4404 to 0.8969</b> | <b>0.764</b> | <b>0.6977 to 0.8227</b> | <b>0.470</b> |  |
| 3.500           | 0.471        | 0.2298 to 0.7219        | 0.869        | 0.8129 to 0.9135        | 0.340        |  |
| 4.500           | 0.294        | 0.1031 to 0.5596        | 0.916        | 0.8675 to 0.9514        | 0.210        |  |

| SSQ1 vs JDS 4.5+ |              |                         |              |                         |              |  |
|------------------|--------------|-------------------------|--------------|-------------------------|--------------|--|
| Cutoff >         | Sensitivity  | 95% CI                  | Specificity  | 95% CI                  | youden's j   |  |
| 1.500            | 1.000        | 0.8049 to 1.000         | 0.471        | 0.3987 to 0.5446        | 0.471        |  |
| <b>2.500</b>     | <b>0.941</b> | <b>0.7131 to 0.9985</b> | <b>0.723</b> | <b>0.6533 to 0.7847</b> | <b>0.664</b> |  |
| 3.500            | 0.765        | 0.5010 to 0.9319        | 0.848        | 0.7893 to 0.8959        | 0.613        |  |
| 4.500            | 0.765        | 0.5010 to 0.9319        | 0.890        | 0.8369 to 0.9306        | 0.655        |  |
| 5.500            | 0.471        | 0.2298 to 0.7219        | 0.922        | 0.8738 to 0.9554        | 0.392        |  |
| 6.500            | 0.353        | 0.1421 to 0.6167        | 0.958        | 0.9191 to 0.9817        | 0.311        |  |

| SSQ2 vs JDS 4.5+ |              |                         |              |                         |              |  |
|------------------|--------------|-------------------------|--------------|-------------------------|--------------|--|
| Cutoff >         | Sensitivity  | 95% CI                  | Specificity  | 95% CI                  | youden's j   |  |
| 1.500            | 1.000        | 0.8049 to 1.000         | 0.623        | 0.5502 to 0.6920        | 0.623        |  |
| 2.500            | 0.824        | 0.5657 to 0.9620        | 0.801        | 0.7373 to 0.8552        | 0.625        |  |
| <b>3.500</b>     | <b>0.765</b> | <b>0.5010 to 0.9319</b> | <b>0.885</b> | <b>0.8308 to 0.9264</b> | <b>0.650</b> |  |
| 4.500            | 0.588        | 0.3292 to 0.8156        | 0.911        | 0.8613 to 0.9473        | 0.499        |  |
| 5.500            | 0.412        | 0.1844 to 0.6708        | 0.958        | 0.9191 to 0.9817        | 0.370        |  |
| 6.500            | 0.235        | 0.06811 to 0.4990       | 0.990        | 0.9627 to 0.9987        | 0.225        |  |

| SSQ3 vs JDS 4.5+ |              |                         |              |                         |              |  |
|------------------|--------------|-------------------------|--------------|-------------------------|--------------|--|
| Cutoff >         | Sensitivity  | 95% CI                  | Specificity  | 95% CI                  | youden's j   |  |
| 1.500            | 1.000        | 0.8049 to 1.000         | 0.670        | 0.5986 to 0.7363        | 0.670        |  |
| <b>2.500</b>     | <b>0.882</b> | <b>0.6356 to 0.9854</b> | <b>0.838</b> | <b>0.7776 to 0.8870</b> | <b>0.720</b> |  |
| 3.500            | 0.706        | 0.4404 to 0.8969        | 0.911        | 0.8613 to 0.9473        | 0.617        |  |
| 4.500            | 0.706        | 0.4404 to 0.8969        | 0.948        | 0.9058 to 0.9746        | 0.654        |  |
| 5.500            | 0.471        | 0.2298 to 0.7219        | 0.958        | 0.9191 to 0.9817        | 0.429        |  |
| 6.500            | 0.235        | 0.06811 to 0.4990       | 0.995        | 0.9712 to 0.9999        | 0.230        |  |

| SSQ4 vs JDS 4.5+ |              |                        |              |                         |              |  |
|------------------|--------------|------------------------|--------------|-------------------------|--------------|--|
| Cutoff >         | Sensitivity  | 95% CI                 | Specificity  | 95% CI                  | youden's j   |  |
| 1.500            | 1.000        | 0.8049 to 1.000        | 0.414        | 0.3430 to 0.4870        | 0.414        |  |
| <b>2.500</b>     | <b>1.000</b> | <b>0.8049 to 1.000</b> | <b>0.712</b> | <b>0.6422 to 0.7751</b> | <b>0.712</b> |  |
| 3.500            | 0.706        | 0.4404 to 0.8969       | 0.864        | 0.8069 to 0.9091        | 0.570        |  |
| 4.500            | 0.529        | 0.2781 to 0.7702       | 0.916        | 0.8675 to 0.9514        | 0.446        |  |
| 5.500            | 0.412        | 0.1844 to 0.6708       | 0.953        | 0.9124 to 0.9782        | 0.365        |  |
| 6.500            | 0.235        | 0.06811 to 0.4990      | 0.990        | 0.9627 to 0.9987        | 0.225        |  |

| SSQ5 vs JDS 4.5+ |              |                         |              |                         |              |  |
|------------------|--------------|-------------------------|--------------|-------------------------|--------------|--|
| Cutoff >         | Sensitivity  | 95% CI                  | Specificity  | 95% CI                  | youden's j   |  |
| 1.500            | 1.000        | 0.8049 to 1.000         | 0.487        | 0.4141 to 0.5601        | 0.487        |  |
| <b>2.500</b>     | <b>0.941</b> | <b>0.7131 to 0.9985</b> | <b>0.723</b> | <b>0.6533 to 0.7847</b> | <b>0.664</b> |  |
| 3.500            | 0.706        | 0.4404 to 0.8969        | 0.874        | 0.8188 to 0.9178        | 0.580        |  |
| 4.500            | 0.588        | 0.3292 to 0.8156        | 0.922        | 0.8738 to 0.9554        | 0.510        |  |
| 5.500            | 0.353        | 0.1421 to 0.6167        | 0.984        | 0.9548 to 0.9967        | 0.337        |  |
| 6.500            | 0.177        | 0.03799 to 0.4343       | 0.995        | 0.9712 to 0.9999        | 0.171        |  |

| SSQ6 vs JDS 4.5+ |              |                         |              |                         |              |  |
|------------------|--------------|-------------------------|--------------|-------------------------|--------------|--|
| Cutoff >         | Sensitivity  | 95% CI                  | Specificity  | 95% CI                  | youden's j   |  |
| 1.500            | 0.941        | 0.7131 to 0.9985        | 0.309        | 0.2442 to 0.3797        | 0.250        |  |
| 2.500            | 0.882        | 0.6356 to 0.9854        | 0.623        | 0.5502 to 0.6920        | 0.505        |  |
| 3.500            | 0.765        | 0.5010 to 0.9319        | 0.738        | 0.6699 to 0.7990        | 0.503        |  |
| 4.500            | 0.765        | 0.5010 to 0.9319        | 0.838        | 0.7776 to 0.8870        | 0.602        |  |
| <b>5.500</b>     | <b>0.706</b> | <b>0.4404 to 0.8969</b> | <b>0.932</b> | <b>0.8864 to 0.9633</b> | <b>0.638</b> |  |
| 6.500            | 0.294        | 0.1031 to 0.5596        | 0.979        | 0.9472 to 0.9943        | 0.273        |  |

| SSQ7 vs JDS 4.5+ |              |                         |              |                         |              |  |
|------------------|--------------|-------------------------|--------------|-------------------------|--------------|--|
| Cutoff >         | Sensitivity  | 95% CI                  | Specificity  | 95% CI                  | youden's j   |  |
| 1.500            | 1.000        | 0.8049 to 1.000         | 0.497        | 0.4244 to 0.5705        | 0.497        |  |
| <b>2.500</b>     | <b>0.882</b> | <b>0.6356 to 0.9854</b> | <b>0.785</b> | <b>0.7203 to 0.8413</b> | <b>0.668</b> |  |
| 3.500            | 0.706        | 0.4404 to 0.8969        | 0.890        | 0.8369 to 0.9306        | 0.596        |  |
| 4.500            | 0.647        | 0.3833 to 0.8579        | 0.932        | 0.8864 to 0.9633        | 0.579        |  |
| 5.500            | 0.471        | 0.2298 to 0.7219        | 0.969        | 0.9329 to 0.9884        | 0.439        |  |
| 6.500            | 0.235        | 0.06811 to 0.4990       | 0.995        | 0.9712 to 0.9999        | 0.230        |  |

| SSQ8 vs JDS 4.5+ |              |                         |              |                         |              |  |
|------------------|--------------|-------------------------|--------------|-------------------------|--------------|--|
| Cutoff >         | Sensitivity  | 95% CI                  | Specificity  | 95% CI                  | youden's j   |  |
| 1.500            | 0.882        | 0.6356 to 0.9854        | 0.801        | 0.7373 to 0.8552        | 0.683        |  |
| <b>2.500</b>     | <b>0.765</b> | <b>0.5010 to 0.9319</b> | <b>0.927</b> | <b>0.8801 to 0.9593</b> | <b>0.691</b> |  |
| 3.500            | 0.647        | 0.3833 to 0.8579        | 0.963        | 0.9259 to 0.9851        | 0.611        |  |
| 4.500            | 0.588        | 0.3292 to 0.8156        | 0.974        | 0.9400 to 0.9914        | 0.562        |  |
| 5.500            | 0.412        | 0.1844 to 0.6708        | 0.995        | 0.9712 to 0.9999        | 0.407        |  |
| 6.500            | 0.177        | 0.03799 to 0.4343       | 0.995        | 0.9712 to 0.9999        | 0.171        |  |

| SSQG vs JDS 4.5+ |              |                         |              |                         |              |  |
|------------------|--------------|-------------------------|--------------|-------------------------|--------------|--|
| Cutoff >         | Sensitivity  | 95% CI                  | Specificity  | 95% CI                  | youden's j   |  |
| 8.500            | 1.000        | 0.8049 to 1.000         | 0.162        | 0.1130 to 0.2224        | 0.162        |  |
| 9.500            | 1.000        | 0.8049 to 1.000         | 0.257        | 0.1962 to 0.3246        | 0.257        |  |
| 10.500           | 1.000        | 0.8049 to 1.000         | 0.361        | 0.2932 to 0.4337        | 0.361        |  |
| 11.500           | 1.000        | 0.8049 to 1.000         | 0.450        | 0.3784 to 0.5237        | 0.450        |  |
| 12.500           | 1.000        | 0.8049 to 1.000         | 0.513        | 0.4399 to 0.5859        | 0.513        |  |
| 13.500           | 1.000        | 0.8049 to 1.000         | 0.565        | 0.4920 to 0.6369        | 0.565        |  |
| 14.500           | 1.000        | 0.8049 to 1.000         | 0.618        | 0.5449 to 0.6870        | 0.618        |  |
| 15.500           | 1.000        | 0.8049 to 1.000         | 0.660        | 0.5878 to 0.7265        | 0.660        |  |
| 16.500           | 1.000        | 0.8049 to 1.000         | 0.681        | 0.6095 to 0.7461        | 0.681        |  |
| 17.500           | 0.941        | 0.7131 to 0.9985        | 0.707        | 0.6368 to 0.7703        | 0.648        |  |
| 18.500           | 0.941        | 0.7131 to 0.9985        | 0.754        | 0.6865 to 0.8132        | 0.695        |  |
| 19.500           | 0.882        | 0.6356 to 0.9854        | 0.775        | 0.7090 to 0.8320        | 0.657        |  |
| 20.500           | 0.882        | 0.6356 to 0.9854        | 0.785        | 0.7203 to 0.8413        | 0.668        |  |
| 21.500           | 0.882        | 0.6356 to 0.9854        | 0.801        | 0.7373 to 0.8552        | 0.683        |  |
| 22.500           | 0.882        | 0.6356 to 0.9854        | 0.848        | 0.7893 to 0.8959        | 0.731        |  |
| <b>23.500</b>    | <b>0.882</b> | <b>0.6356 to 0.9854</b> | <b>0.859</b> | <b>0.8010 to 0.9047</b> | <b>0.741</b> |  |
| 24.500           | 0.765        | 0.5010 to 0.9319        | 0.874        | 0.8188 to 0.9178        | 0.639        |  |
| 26.000           | 0.765        | 0.5010 to 0.9319        | 0.890        | 0.8369 to 0.9306        | 0.655        |  |
| 27.500           | 0.706        | 0.4404 to 0.8969        | 0.901        | 0.8490 to 0.9390        | 0.606        |  |
| 28.500           | 0.706        | 0.4404 to 0.8969        | 0.906        | 0.8552 to 0.9432        | 0.612        |  |
| 30.000           | 0.706        | 0.4404 to 0.8969        | 0.922        | 0.8738 to 0.9554        | 0.627        |  |
| 33.500           | 0.706        | 0.4404 to 0.8969        | 0.932        | 0.8864 to 0.9633        | 0.638        |  |
| 36.500           | 0.706        | 0.4404 to 0.8969        | 0.942        | 0.8993 to 0.9709        | 0.648        |  |
| 37.500           | 0.647        | 0.3833 to 0.8579        | 0.942        | 0.8993 to 0.9709        | 0.590        |  |
| 38.500           | 0.588        | 0.3292 to 0.8156        | 0.942        | 0.8993 to 0.9709        | 0.531        |  |
| 40.000           | 0.588        | 0.3292 to 0.8156        | 0.948        | 0.9058 to 0.9746        | 0.536        |  |
| 41.500           | 0.529        | 0.2781 to 0.7702        | 0.958        | 0.9191 to 0.9817        | 0.488        |  |
| 42.500           | 0.471        | 0.2298 to 0.7219        | 0.963        | 0.9259 to 0.9851        | 0.434        |  |
| 43.500           | 0.412        | 0.1844 to 0.6708        | 0.974        | 0.9400 to 0.9914        | 0.386        |  |
| 44.500           | 0.412        | 0.1844 to 0.6708        | 0.984        | 0.9548 to 0.9967        | 0.396        |  |
| 46.500           | 0.294        | 0.1031 to 0.5596        | 0.984        | 0.9548 to 0.9967        | 0.278        |  |
| 48.500           | 0.294        | 0.1031 to 0.5596        | 0.995        | 0.9712 to 0.9999        | 0.289        |  |
| 51.000           | 0.235        | 0.06811 to 0.4990       | 0.995        | 0.9712 to 0.9999        | 0.230        |  |
| 54.500           | 0.177        | 0.03799 to 0.4343       | 0.995        | 0.9712 to 0.9999        | 0.171        |  |

## Subjective versus JDS Moderate Scores (2.7+)

*Sensitivity and Specificity for each Threshold*

| KSS vs JDS 2.7+ |              |                         |              |                         |              |
|-----------------|--------------|-------------------------|--------------|-------------------------|--------------|
| Cutoff >        | Sensitivity  | 95% CI                  | Specificity  | 95% CI                  | youden's j   |
| 1.5             | 0.932        | 0.8493 to 0.9777        | 0.179        | 0.1183 to 0.2547        | 0.112        |
| 2.5             | 0.757        | 0.6431 to 0.8490        | 0.418        | 0.3333 to 0.5062        | 0.175        |
| 3.5             | 0.622        | 0.5013 to 0.7319        | 0.612        | 0.5240 to 0.6948        | 0.234        |
| <b>4.5</b>      | <b>0.595</b> | <b>0.4741 to 0.7073</b> | <b>0.716</b> | <b>0.6321 to 0.7909</b> | <b>0.311</b> |
| 5.5             | 0.487        | 0.3685 to 0.6056        | 0.769        | 0.6880 to 0.8371        | 0.255        |
| 6.5             | 0.446        | 0.3302 to 0.5661        | 0.828        | 0.7537 to 0.8880        | 0.274        |
| 7.5             | 0.351        | 0.2439 to 0.4711        | 0.925        | 0.8670 to 0.9636        | 0.277        |
| 8.5             | 0.162        | 0.08670 to 0.2661       | 0.970        | 0.9253 to 0.9918        | 0.132        |

| LFA vs JDS 2.7+ |              |                         |              |                         |              |
|-----------------|--------------|-------------------------|--------------|-------------------------|--------------|
| Cutoff >        | Sensitivity  | 95% CI                  | Specificity  | 95% CI                  | youden's j   |
| 1.5             | 0.662        | 0.5428 to 0.7681        | 0.545        | 0.4565 to 0.6310        | 0.207        |
| <b>2.5</b>      | <b>0.473</b> | <b>0.3557 to 0.5925</b> | <b>0.836</b> | <b>0.7620 to 0.8942</b> | <b>0.309</b> |
| 3.5             | 0.284        | 0.1850 to 0.4005        | 0.910        | 0.8488 to 0.9529        | 0.194        |
| 4.5             | 0.189        | 0.1075 to 0.2970        | 0.948        | 0.8953 to 0.9787        | 0.137        |

| SSQ1 vs JDS 2.7+ |              |                         |              |                         |              |
|------------------|--------------|-------------------------|--------------|-------------------------|--------------|
| Cutoff >         | Sensitivity  | 95% CI                  | Specificity  | 95% CI                  | youden's j   |
| 1.5              | 0.730        | 0.6139 to 0.8265        | 0.522        | 0.4344 to 0.6093        | 0.252        |
| <b>2.5</b>       | <b>0.554</b> | <b>0.4339 to 0.6698</b> | <b>0.791</b> | <b>0.7124 to 0.8564</b> | <b>0.345</b> |
| 3.5              | 0.392        | 0.2804 to 0.5123        | 0.903        | 0.8398 to 0.9473        | 0.295        |
| 4.5              | 0.351        | 0.2439 to 0.4711        | 0.940        | 0.8858 to 0.9739        | 0.292        |
| 5.5              | 0.230        | 0.1399 to 0.3421        | 0.955        | 0.9051 to 0.9834        | 0.185        |
| 6.5              | 0.122        | 0.05715 to 0.2184       | 0.963        | 0.9151 to 0.9878        | 0.084        |

| SSQ2 vs JDS 2.7+ |              |                         |              |                         |              |
|------------------|--------------|-------------------------|--------------|-------------------------|--------------|
| Cutoff >         | Sensitivity  | 95% CI                  | Specificity  | 95% CI                  | youden's j   |
| <b>1.5</b>       | <b>0.662</b> | <b>0.5428 to 0.7681</b> | <b>0.702</b> | <b>0.6164 to 0.7774</b> | <b>0.364</b> |
| 2.5              | 0.473        | 0.3557 to 0.5925        | 0.873        | 0.8047 to 0.9243        | 0.346        |
| 3.5              | 0.365        | 0.2560 to 0.4849        | 0.940        | 0.8858 to 0.9739        | 0.305        |
| 4.5              | 0.297        | 0.1966 to 0.4148        | 0.963        | 0.9151 to 0.9878        | 0.260        |
| 5.5              | 0.162        | 0.08670 to 0.2661       | 0.978        | 0.9360 to 0.9954        | 0.140        |
| 6.5              | 0.068        | 0.02230 to 0.1507       | 0.993        | 0.9591 to 0.9998        | 0.060        |

| SSQ3 vs JDS 2.7+ |              |                         |              |                         |              |
|------------------|--------------|-------------------------|--------------|-------------------------|--------------|
| Cutoff >         | Sensitivity  | 95% CI                  | Specificity  | 95% CI                  | youden's j   |
| <b>1.5</b>       | <b>0.608</b> | <b>0.4877 to 0.7196</b> | <b>0.739</b> | <b>0.6559 to 0.8108</b> | <b>0.347</b> |
| 2.5              | 0.405        | 0.2927 to 0.5259        | 0.881        | 0.8133 to 0.9302        | 0.286        |
| 3.5              | 0.311        | 0.2083 to 0.4290        | 0.955        | 0.9051 to 0.9834        | 0.266        |
| 4.5              | 0.257        | 0.1622 to 0.3716        | 0.978        | 0.9360 to 0.9954        | 0.234        |
| 5.5              | 0.176        | 0.09699 to 0.2817       | 0.978        | 0.9360 to 0.9954        | 0.153        |
| 6.5              | 0.068        | 0.02230 to 0.1507       | 1.000        | 0.9728 to 1.000         | 0.068        |

| SSQ4 vs JDS 2.7+ |              |                         |              |                         |              |
|------------------|--------------|-------------------------|--------------|-------------------------|--------------|
| Cutoff >         | Sensitivity  | 95% CI                  | Specificity  | 95% CI                  | youden's j   |
| 1.5              | 0.770        | 0.6579 to 0.8601        | 0.463        | 0.3762 to 0.5508        | 0.233        |
| 2.5              | <b>0.554</b> | <b>0.4339 to 0.6698</b> | <b>0.769</b> | <b>0.6880 to 0.8371</b> | <b>0.323</b> |
| 3.5              | 0.378        | 0.2681 to 0.4987        | 0.925        | 0.8670 to 0.9636        | 0.304        |
| 4.5              | 0.270        | 0.1735 to 0.3861        | 0.963        | 0.9151 to 0.9878        | 0.233        |
| 5.5              | 0.189        | 0.1075 to 0.2970        | 0.985        | 0.9471 to 0.9982        | 0.174        |
| 6.5              | 0.081        | 0.03034 to 0.1682       | 1.000        | 0.9728 to 1.000         | 0.081        |

| SSQ5 vs JDS 2.7+ |              |                         |              |                         |            |
|------------------|--------------|-------------------------|--------------|-------------------------|------------|
| Cutoff >         | Sensitivity  | 95% CI                  | Specificity  | 95% CI                  | youden's j |
| 1.5              | <b>0.689</b> | <b>0.5710 to 0.7917</b> | <b>0.522</b> | <b>0.4344 to 0.6093</b> | 0.212      |
| 2.5              | 0.487        | 0.3685 to 0.6056        | 0.754        | 0.6719 to 0.8240        | 0.240      |
| 3.5              | 0.324        | 0.2200 to 0.4432        | 0.910        | 0.8488 to 0.9529        | 0.235      |
| 4.5              | 0.270        | 0.1735 to 0.3861        | 0.963        | 0.9151 to 0.9878        | 0.233      |
| 5.5              | 0.122        | 0.05715 to 0.2184       | 1.000        | 0.9728 to 1.000         | 0.122      |
| 6.5              | 0.054        | 0.01492 to 0.1327       | 1.000        | 0.9728 to 1.000         | 0.054      |

| SSQ6 vs JDS 2.7+ |              |                         |              |                         |              |
|------------------|--------------|-------------------------|--------------|-------------------------|--------------|
| Cutoff >         | Sensitivity  | 95% CI                  | Specificity  | 95% CI                  | youden's j   |
| 1.5              | 0.824        | 0.7183 to 0.9030        | 0.351        | 0.2704 to 0.4379        | 0.175        |
| 2.5              | <b>0.595</b> | <b>0.4741 to 0.7073</b> | <b>0.679</b> | <b>0.5930 to 0.7571</b> | <b>0.274</b> |
| 3.5              | 0.432        | 0.3177 to 0.5528        | 0.769        | 0.6880 to 0.8371        | 0.201        |
| 4.5              | 0.365        | 0.2560 to 0.4849        | 0.873        | 0.8047 to 0.9243        | 0.238        |
| 5.5              | 0.243        | 0.1510 to 0.3569        | 0.948        | 0.8953 to 0.9787        | 0.191        |
| 6.5              | 0.108        | 0.04784 to 0.2020       | 0.993        | 0.9591 to 0.9998        | 0.101        |

| SSQ7 vs JDS 2.7+ |              |                         |              |                         |              |
|------------------|--------------|-------------------------|--------------|-------------------------|--------------|
| Cutoff >         | Sensitivity  | 95% CI                  | Specificity  | 95% CI                  | youden's j   |
| 1.5              | 0.676        | 0.5568 to 0.7800        | 0.530        | 0.4418 to 0.6166        | 0.206        |
| 2.5              | <b>0.500</b> | <b>0.3814 to 0.6186</b> | <b>0.858</b> | <b>0.7875 to 0.9124</b> | <b>0.358</b> |
| 3.5              | 0.338        | 0.2319 to 0.4572        | 0.940        | 0.8858 to 0.9739        | 0.278        |
| 4.5              | 0.257        | 0.1622 to 0.3716        | 0.963        | 0.9151 to 0.9878        | 0.220        |
| 5.5              | 0.176        | 0.09699 to 0.2817       | 0.993        | 0.9591 to 0.9998        | 0.168        |
| 6.5              | 0.068        | 0.02230 to 0.1507       | 1.000        | 0.9728 to 1.000         | 0.068        |

| SSQ8 vs JDS 2.7+ |              |                         |              |                         |              |
|------------------|--------------|-------------------------|--------------|-------------------------|--------------|
| Cutoff >         | Sensitivity  | 95% CI                  | Specificity  | 95% CI                  | youden's j   |
| 1.5              | 0.378        | 0.2681 to 0.4987        | 0.813        | 0.7370 to 0.8755        | 0.192        |
| 2.5              | <b>0.284</b> | <b>0.1850 to 0.4005</b> | <b>0.955</b> | <b>0.9051 to 0.9834</b> | <b>0.239</b> |
| 3.5              | 0.203        | 0.1181 to 0.3122        | 0.978        | 0.9360 to 0.9954        | 0.180        |
| 4.5              | 0.162        | 0.08670 to 0.2661       | 0.978        | 0.9360 to 0.9954        | 0.140        |
| 5.5              | 0.108        | 0.04784 to 0.2020       | 1.000        | 0.9728 to 1.000         | 0.108        |
| 6.5              | 0.054        | 0.01492 to 0.1327       | 1.000        | 0.9728 to 1.000         | 0.054        |

| SSQG vs JDS 2.7+ |              |                         |              |                         |              |
|------------------|--------------|-------------------------|--------------|-------------------------|--------------|
| Cutoff >         | Sensitivity  | 95% CI                  | Specificity  | 95% CI                  | youden's j   |
| 8.5              | 0.932        | 0.8493 to 0.9777        | 0.194        | 0.1308 to 0.2712        | 0.126        |
| 9.5              | 0.851        | 0.7496 to 0.9234        | 0.284        | 0.2091 to 0.3679        | 0.135        |
| 10.5             | 0.770        | 0.6579 to 0.8601        | 0.388        | 0.3052 to 0.4760        | 0.158        |
| 11.5             | 0.716        | 0.5995 to 0.8150        | 0.485        | 0.3979 to 0.5729        | 0.201        |
| 12.5             | 0.662        | 0.5428 to 0.7681        | 0.545        | 0.4565 to 0.6310        | 0.207        |
| 13.5             | 0.649        | 0.5289 to 0.7561        | 0.612        | 0.5240 to 0.6948        | 0.260        |
| 14.5             | 0.595        | 0.4741 to 0.7073        | 0.657        | 0.5698 to 0.7365        | 0.251        |
| 15.5             | 0.581        | 0.4606 to 0.6949        | 0.709        | 0.6243 to 0.7842        | 0.290        |
| 16.5             | 0.568        | 0.4472 to 0.6823        | 0.731        | 0.6480 to 0.8042        | 0.299        |
| 17.5             | 0.554        | 0.4339 to 0.6698        | 0.769        | 0.6880 to 0.8371        | 0.323        |
| 18.5             | 0.527        | 0.4075 to 0.6443        | 0.821        | 0.7453 to 0.8817        | 0.348        |
| 19.5             | 0.513        | 0.3944 to 0.6315        | 0.851        | 0.7789 to 0.9064        | 0.364        |
| 20.5             | 0.500        | 0.3814 to 0.6186        | 0.858        | 0.7875 to 0.9124        | 0.358        |
| 21.5             | 0.487        | 0.3685 to 0.6056        | 0.873        | 0.8047 to 0.9243        | 0.360        |
| <b>22.5</b>      | <b>0.460</b> | <b>0.3429 to 0.5793</b> | <b>0.925</b> | <b>0.8670 to 0.9636</b> | <b>0.385</b> |
| 23.5             | 0.446        | 0.3302 to 0.5661        | 0.933        | 0.8763 to 0.9688        | 0.379        |
| 24.5             | 0.392        | 0.2804 to 0.5123        | 0.940        | 0.8858 to 0.9739        | 0.332        |
| 26               | 0.378        | 0.2681 to 0.4987        | 0.955        | 0.9051 to 0.9834        | 0.334        |
| 27.5             | 0.338        | 0.2319 to 0.4572        | 0.955        | 0.9051 to 0.9834        | 0.293        |
| 28.5             | 0.324        | 0.2200 to 0.4432        | 0.955        | 0.9051 to 0.9834        | 0.280        |
| 30               | 0.297        | 0.1966 to 0.4148        | 0.963        | 0.9151 to 0.9878        | 0.260        |
| 33.5             | 0.284        | 0.1850 to 0.4005        | 0.970        | 0.9253 to 0.9918        | 0.254        |
| 36.5             | 0.257        | 0.1622 to 0.3716        | 0.970        | 0.9253 to 0.9918        | 0.227        |
| 37.5             | 0.243        | 0.1510 to 0.3569        | 0.970        | 0.9253 to 0.9918        | 0.213        |
| 38.5             | 0.230        | 0.1399 to 0.3421        | 0.970        | 0.9253 to 0.9918        | 0.200        |
| 40               | 0.216        | 0.1289 to 0.3272        | 0.970        | 0.9253 to 0.9918        | 0.186        |
| 41.5             | 0.189        | 0.1075 to 0.2970        | 0.978        | 0.9360 to 0.9954        | 0.167        |
| 42.5             | 0.162        | 0.08670 to 0.2661       | 0.978        | 0.9360 to 0.9954        | 0.140        |
| 43.5             | 0.122        | 0.05715 to 0.2184       | 0.978        | 0.9360 to 0.9954        | 0.099        |
| 44.5             | 0.122        | 0.05715 to 0.2184       | 0.993        | 0.9591 to 0.9998        | 0.114        |
| 46.5             | 0.095        | 0.03888 to 0.1852       | 0.993        | 0.9591 to 0.9998        | 0.087        |
| 48.5             | 0.081        | 0.03034 to 0.1682       | 1.000        | 0.9728 to 1.000         | 0.081        |
| 51               | 0.068        | 0.02230 to 0.1507       | 1.000        | 0.9728 to 1.000         | 0.068        |
| 54.5             | 0.054        | 0.01492 to 0.1327       | 1.000        | 0.9728 to 1.000         | 0.054        |



## Subjective versus EEG Microsleep

*Sensitivity and Specificity for each Threshold*

| KSS vs EEG Microsleep |              |                         |              |                         |              |
|-----------------------|--------------|-------------------------|--------------|-------------------------|--------------|
| Cutoff >              | Sensitivity  | 95% CI                  | Specificity  | 95% CI                  | youden's j   |
| 1.5                   | 0.882        | 0.6830 to 0.9877        | 0.140        | 0.09426 to 0.1970       | 0.022        |
| 2.5                   | 0.765        | 0.5090 to 0.9134        | 0.363        | 0.2949 to 0.4348        | 0.127        |
| 3.5                   | 0.706        | 0.4572 to 0.8811        | 0.544        | 0.4710 to 0.6157        | 0.250        |
| 4.5                   | 0.647        | 0.4078 to 0.8461        | 0.622        | 0.5493 to 0.6904        | 0.269        |
| <b>5.5</b>            | <b>0.588</b> | <b>0.3605 to 0.8088</b> | <b>0.694</b> | <b>0.6241 to 0.7584</b> | <b>0.282</b> |
| 6.5                   | 0.471        | 0.2306 to 0.6847        | 0.741        | 0.6731 to 0.8012        | 0.212        |
| 7.5                   | 0.353        | 0.1539 to 0.5922        | 0.839        | 0.7798 to 0.8882        | 0.192        |
| 8.5                   | 0.235        | 0.08657 to 0.4910       | 0.938        | 0.8939 to 0.9675        | 0.173        |

| LFA vs EEG Microsleep |              |                         |              |                         |              |
|-----------------------|--------------|-------------------------|--------------|-------------------------|--------------|
| Cutoff >              | Sensitivity  | 95% CI                  | Specificity  | 95% CI                  | youden's j   |
| 1.5                   | 0.765        | 0.5090 to 0.9134        | 0.492        | 0.4192 to 0.5653        | 0.257        |
| <b>2.5</b>            | <b>0.647</b> | <b>0.4078 to 0.8461</b> | <b>0.759</b> | <b>0.6921 to 0.8180</b> | <b>0.406</b> |
| 3.5                   | 0.353        | 0.1539 to 0.5922        | 0.859        | 0.8010 to 0.9047        | 0.212        |
| 4.5                   | 0.235        | 0.08657 to 0.4910       | 0.911        | 0.8613 to 0.9473        | 0.146        |

| SSQ1 vs EEG Microsleep |              |                         |              |                         |              |
|------------------------|--------------|-------------------------|--------------|-------------------------|--------------|
| Cutoff >               | Sensitivity  | 95% CI                  | Specificity  | 95% CI                  | youden's j   |
| 1.5                    | 0.882        | 0.6830 to 0.9877        | 0.456        | 0.3843 to 0.5290        | 0.338        |
| 2.5                    | 0.588        | 0.3605 to 0.8088        | 0.684        | 0.6133 to 0.7488        | 0.272        |
| <b>3.5</b>             | <b>0.529</b> | <b>0.3153 to 0.7694</b> | <b>0.824</b> | <b>0.7626 to 0.8748</b> | <b>0.353</b> |
| 4.5                    | 0.412        | 0.1912 to 0.6395        | 0.855        | 0.7972 to 0.9014        | 0.267        |
| 5.5                    | 0.294        | 0.1189 to 0.5428        | 0.902        | 0.8505 to 0.9397        | 0.196        |
| 6.5                    | 0.294        | 0.1189 to 0.5428        | 0.953        | 0.9133 to 0.9785        | 0.248        |

| SSQ2 vs EEG Microsleep |              |                         |              |                         |              |
|------------------------|--------------|-------------------------|--------------|-------------------------|--------------|
| Cutoff >               | Sensitivity  | 95% CI                  | Specificity  | 95% CI                  | youden's j   |
| 1.5                    | 0.647        | 0.4078 to 0.8461        | 0.591        | 0.5178 to 0.6608        | 0.238        |
| <b>2.5</b>             | <b>0.529</b> | <b>0.3153 to 0.7694</b> | <b>0.777</b> | <b>0.7119 to 0.8338</b> | <b>0.307</b> |
| 3.5                    | 0.412        | 0.1912 to 0.6395        | 0.855        | 0.7972 to 0.9014        | 0.267        |
| 4.5                    | 0.177        | 0.05733 to 0.4366       | 0.876        | 0.8206 to 0.9187        | 0.052        |
| 5.5                    | 0.118        | 0.01235 to 0.3170       | 0.933        | 0.8876 to 0.9637        | 0.050        |
| 6.5                    | 0.000        | 0.0 to 0.1684           | 0.969        | 0.9336 to 0.9885        | -0.031       |

| SSQ3 vs EEG Microsleep |              |                         |              |                         |              |
|------------------------|--------------|-------------------------|--------------|-------------------------|--------------|
| Cutoff >               | Sensitivity  | 95% CI                  | Specificity  | 95% CI                  | youden's j   |
| <b>1.5</b>             | <b>0.706</b> | <b>0.4572 to 0.8811</b> | <b>0.643</b> | <b>0.5705 to 0.7100</b> | <b>0.348</b> |
| 2.5                    | 0.412        | 0.1912 to 0.6395        | 0.793        | 0.7287 to 0.8476        | 0.205        |
| 3.5                    | 0.294        | 0.1189 to 0.5428        | 0.871        | 0.8147 to 0.9144        | 0.165        |
| 4.5                    | 0.177        | 0.05733 to 0.4366       | 0.896        | 0.8445 to 0.9355        | 0.073        |
| 5.5                    | 0.177        | 0.05733 to 0.4366       | 0.933        | 0.8876 to 0.9637        | 0.109        |
| 6.5                    | 0.000        | 0.0 to 0.1684           | 0.974        | 0.9406 to 0.9915        | -0.026       |

| SSQ4 vs EEG Microsleep |              |                         |              |                         |              |
|------------------------|--------------|-------------------------|--------------|-------------------------|--------------|
| Cutoff >               | Sensitivity  | 95% CI                  | Specificity  | 95% CI                  | youden's j   |
| 1.5                    | 0.647        | 0.4078 to 0.8461        | 0.380        | 0.3113 to 0.4529        | 0.027        |
| <b>2.5</b>             | <b>0.529</b> | <b>0.3153 to 0.7694</b> | <b>0.667</b> | <b>0.5952 to 0.7329</b> | <b>0.196</b> |
| 3.5                    | 0.294        | 0.1189 to 0.5428        | 0.823        | 0.7614 to 0.8741        | 0.117        |
| 4.5                    | 0.177        | 0.05733 to 0.4366       | 0.880        | 0.8257 to 0.9225        | 0.057        |
| 5.5                    | 0.177        | 0.05733 to 0.4366       | 0.932        | 0.8870 to 0.9635        | 0.109        |
| 6.5                    | 0.059        | 0.001265 to 0.2487      | 0.974        | 0.9403 to 0.9915        | 0.033        |

| SSQ5 vs EEG Microsleep |              |                          |              |                         |              |
|------------------------|--------------|--------------------------|--------------|-------------------------|--------------|
| Cutoff >               | Sensitivity  | 95% CI                   | Specificity  | 95% CI                  | youden's j   |
| 1.5                    | 0.588        | 0.3605 to 0.8088         | 0.446        | 0.3742 to 0.5187        | 0.034        |
| 2.5                    | 0.353        | 0.1539 to 0.5922         | 0.663        | 0.5918 to 0.7295        | 0.016        |
| 3.5                    | 0.177        | 0.05733 to 0.4366        | 0.824        | 0.7626 to 0.8748        | 0.000        |
| <b>4.5</b>             | <b>0.177</b> | <b>0.05733 to 0.4366</b> | <b>0.886</b> | <b>0.8325 to 0.9272</b> | <b>0.063</b> |
| 5.5                    | 0.000        | 0.0 to 0.1684            | 0.953        | 0.9133 to 0.9785        | -0.047       |
| 6.5                    | 0.000        | 0.0 to 0.1684            | 0.979        | 0.9478 to 0.9943        | -0.021       |

| SSQ6 vs EEG Microsleep |              |                         |              |                         |              |
|------------------------|--------------|-------------------------|--------------|-------------------------|--------------|
| Cutoff >               | Sensitivity  | 95% CI                  | Specificity  | 95% CI                  | youden's j   |
| 1.5                    | 0.882        | 0.6830 to 0.9877        | 0.301        | 0.2368 to 0.3705        | 0.183        |
| 2.5                    | 0.647        | 0.4078 to 0.8461        | 0.596        | 0.5230 to 0.6657        | 0.243        |
| <b>3.5</b>             | <b>0.529</b> | <b>0.3153 to 0.7694</b> | <b>0.715</b> | <b>0.6458 to 0.7775</b> | <b>0.244</b> |
| 4.5                    | 0.235        | 0.08657 to 0.4910       | 0.788        | 0.7230 to 0.8430        | 0.023        |
| 5.5                    | 0.118        | 0.01235 to 0.3170       | 0.881        | 0.8266 to 0.9229        | -0.002       |
| 6.5                    | 0.000        | 0.0 to 0.1684           | 0.953        | 0.9133 to 0.9785        | -0.047       |

| SSQ7 vs EEG Microsleep |              |                         |              |                         |              |
|------------------------|--------------|-------------------------|--------------|-------------------------|--------------|
| Cutoff >               | Sensitivity  | 95% CI                  | Specificity  | 95% CI                  | youden's j   |
| 1.5                    | 0.647        | 0.4078 to 0.8461        | 0.461        | 0.3893 to 0.5342        | 0.108        |
| <b>2.5</b>             | <b>0.412</b> | <b>0.1912 to 0.6395</b> | <b>0.741</b> | <b>0.6731 to 0.8012</b> | <b>0.153</b> |
| 3.5                    | 0.177        | 0.05733 to 0.4366       | 0.839        | 0.7798 to 0.8882        | 0.016        |
| 4.5                    | 0.177        | 0.05733 to 0.4366       | 0.886        | 0.8325 to 0.9272        | 0.063        |
| 5.5                    | 0.118        | 0.01235 to 0.3170       | 0.938        | 0.8939 to 0.9675        | 0.055        |
| 6.5                    | 0.000        | 0.0 to 0.1684           | 0.974        | 0.9406 to 0.9915        | -0.026       |

| SSQ8 vs EEG Microsleep |              |                      |              |                         |               |
|------------------------|--------------|----------------------|--------------|-------------------------|---------------|
| Cutoff >               | Sensitivity  | 95% CI               | Specificity  | 95% CI                  | youden's j    |
| 1.5                    | 0.118        | 0.01235 to 0.3170    | 0.731        | 0.6621 to 0.7918        | -0.152        |
| 2.5                    | 0.059        | 0.001265 to 0.2487   | 0.865        | 0.8089 to 0.9101        | -0.076        |
| 3.5                    | 0.000        | 0.0 to 0.1684        | 0.907        | 0.8566 to 0.9438        | -0.093        |
| 4.5                    | 0.000        | 0.0 to 0.1684        | 0.922        | 0.8751 to 0.9558        | -0.078        |
| 5.5                    | 0.000        | 0.0 to 0.1684        | 0.959        | 0.9200 to 0.9819        | -0.042        |
| <b>6.5</b>             | <b>0.000</b> | <b>0.0 to 0.1684</b> | <b>0.979</b> | <b>0.9478 to 0.9943</b> | <b>-0.021</b> |

| SSQG vs EEG Microsleep |              |                         |              |                         |              |
|------------------------|--------------|-------------------------|--------------|-------------------------|--------------|
| Cutoff >               | Sensitivity  | 95% CI                  | Specificity  | 95% CI                  | youden's j   |
| 8.5                    | 0.882        | 0.6830 to 0.9877        | 0.150        | 0.1030 to 0.2086        | 0.033        |
| 9.5                    | 0.882        | 0.6830 to 0.9877        | 0.244        | 0.1848 to 0.3104        | 0.126        |
| 10.5                   | 0.765        | 0.5090 to 0.9134        | 0.337        | 0.2705 to 0.4082        | 0.102        |
| 11.5                   | 0.765        | 0.5090 to 0.9134        | 0.425        | 0.3542 to 0.4979        | 0.190        |
| 12.5                   | 0.706        | 0.4572 to 0.8811        | 0.482        | 0.4095 to 0.5548        | 0.188        |
| 13.5                   | 0.706        | 0.4572 to 0.8811        | 0.534        | 0.4607 to 0.6056        | 0.240        |
| 14.5                   | 0.706        | 0.4572 to 0.8811        | 0.591        | 0.5178 to 0.6608        | 0.297        |
| <b>15.5</b>            | <b>0.706</b> | <b>0.4572 to 0.8811</b> | <b>0.632</b> | <b>0.5599 to 0.7002</b> | <b>0.338</b> |
| 16.5                   | 0.647        | 0.4078 to 0.8461        | 0.648        | 0.5758 to 0.7149        | 0.295        |
| 17.5                   | 0.529        | 0.3153 to 0.7694        | 0.668        | 0.5972 to 0.7343        | 0.198        |
| 18.5                   | 0.529        | 0.3153 to 0.7694        | 0.715        | 0.6458 to 0.7775        | 0.244        |
| 19.5                   | 0.529        | 0.3153 to 0.7694        | 0.741        | 0.6731 to 0.8012        | 0.270        |
| 20.5                   | 0.529        | 0.3153 to 0.7694        | 0.751        | 0.6841 to 0.8106        | 0.281        |
| 21.5                   | 0.529        | 0.3153 to 0.7694        | 0.767        | 0.7007 to 0.8246        | 0.296        |
| 22.5                   | 0.412        | 0.1912 to 0.6395        | 0.803        | 0.7399 to 0.8567        | 0.215        |
| 23.5                   | 0.353        | 0.1539 to 0.5922        | 0.808        | 0.7456 to 0.8613        | 0.161        |
| 24.5                   | 0.294        | 0.1189 to 0.5428        | 0.829        | 0.7683 to 0.8793        | 0.123        |
| 26                     | 0.235        | 0.08657 to 0.4910       | 0.839        | 0.7798 to 0.8882        | 0.075        |
| 27.5                   | 0.235        | 0.08657 to 0.4910       | 0.855        | 0.7972 to 0.9014        | 0.090        |
| 28.5                   | 0.235        | 0.08657 to 0.4910       | 0.860        | 0.8030 to 0.9057        | 0.095        |
| 30                     | 0.177        | 0.05733 to 0.4366       | 0.871        | 0.8147 to 0.9144        | 0.047        |
| 32.5                   | 0.177        | 0.05733 to 0.4366       | 0.881        | 0.8266 to 0.9229        | 0.057        |
| 35                     | 0.177        | 0.05733 to 0.4366       | 0.886        | 0.8325 to 0.9272        | 0.063        |
| 36.5                   | 0.177        | 0.05733 to 0.4366       | 0.896        | 0.8445 to 0.9355        | 0.073        |
| 37.5                   | 0.177        | 0.05733 to 0.4366       | 0.902        | 0.8505 to 0.9397        | 0.078        |
| 38.5                   | 0.177        | 0.05733 to 0.4366       | 0.907        | 0.8566 to 0.9438        | 0.083        |
| 40                     | 0.177        | 0.05733 to 0.4366       | 0.912        | 0.8627 to 0.9478        | 0.088        |
| 41.5                   | 0.177        | 0.05733 to 0.4366       | 0.928        | 0.8813 to 0.9598        | 0.104        |
| 42.5                   | 0.177        | 0.05733 to 0.4366       | 0.938        | 0.8939 to 0.9675        | 0.114        |
| 43.5                   | 0.059        | 0.001265 to 0.2487      | 0.943        | 0.9003 to 0.9712        | 0.002        |
| 44.5                   | 0.000        | 0.0 to 0.1684           | 0.948        | 0.9068 to 0.9749        | -0.052       |
| 46.5                   | 0.000        | 0.0 to 0.1684           | 0.959        | 0.9200 to 0.9819        | -0.042       |
| 48.5                   | 0.000        | 0.0 to 0.1684           | 0.969        | 0.9336 to 0.9885        | -0.031       |
| 51                     | 0.000        | 0.0 to 0.1684           | 0.974        | 0.9406 to 0.9915        | -0.026       |
| 54.5                   |              | 0 0.0 to 0.1684         | 0.9793       | 0.9478 to 0.9943        | -0.0207      |
